# Supplementary material for: Speciation and the structure of lead(ii) in hyper-alkaline aqueous solution
Source: Royal Society of Chemistry journal article supplement (doi:10.1039/c4dt02757d), 2014-01-01
Supplement: c4dt02757d1.pdf [file c4dt02757d1.pdf]

## The Structure of Pb(II) Ion in Hyper-Alkaline Aqueous Solution

Éva G. Bajnóczi,<sup>a,f</sup> István Pálinkó,<sup>b,f</sup> Tamás Körtvélyesi,<sup>c</sup> Szabolcs Bálint,<sup>d</sup> Imre Bakó,<sup>d</sup> Pál Sipos,<sup>a,f,\*</sup>  
and Ingmar Persson<sup>e,\*</sup>

<sup>a</sup> Department of Inorganic and Analytical Chemistry, University of Szeged, H-6720 Dóm tér 7., Szeged, Hungary.

<sup>b</sup> Department of Organic Chemistry, University of Szeged, H-6720 Dóm tér 8., Szeged, Hungary.

<sup>c</sup> Department of Physical Chemistry and Materials Science, University of Szeged, H-6720 Aradi vértanúk tere 1., Szeged, Hungary

<sup>d</sup> Institute of Molecular Pharmacology, Research Centre for Natural Sciences, Hungarian Academy of Sciences, Pusztaszeri út 59-67, H-1025 Budapest, Hungary

<sup>e</sup> Department of Chemistry and Biotechnology, Swedish University of Agricultural Sciences, SE-750 07, Uppsala, Sweden

<sup>f</sup> Materials and Solution Structure Research Group, Institute of Chemistry, University of Szeged H-6720 Aradi vértanúk tere 1., Szeged, Hungary

**Electronic Supplementary Information**

**Table S1** The oxygen coordinated lead(II) structures used for determine the coordination number – Pb-O distance relationship for coordination number = 2, 3, 4, 5, 6, 8. The list is based on the data collected from the Inorganic Crystal Structure Database (ICSD) and the Cambridge Structural Database (CSD); *N* = coordination number; references marked in red text are omitted from the mean bond distance and angle. All the other structural data are listed in reference 4.

| <i>N</i> | CSD code       | <i>d</i> <sub>Pb-O</sub> | ∠O-Pb-O                     | Reference                                                                                                                                                                                           |
|----------|----------------|--------------------------|-----------------------------|-----------------------------------------------------------------------------------------------------------------------------------------------------------------------------------------------------|
| 2        | VEYKUH         | 2.189 Å                  | 100.6 °                     | Rekken, B. D.; Brown, T. M.; Olmstead, M. M.; Fettingner, J. C.; Power, P. P. <i>Inorg. Chem.</i> <b>2013</b> , 52, 3054.                                                                           |
|          | <b>Mean</b>    | <b>2.189 Å/1</b>         |                             |                                                                                                                                                                                                     |
| 3        | QAHVOL         | 2.216 Å                  | 86.5 °                      | Nehete, U. N.; Chandrasekhar, V.; Jancik, V.; Roesky, H. W.; Herbst-Irmer, R. <i>Organometallics</i> <b>2004</b> , 23, 5372-5374.                                                                   |
| 3        | QEXVUL         | 2.244 Å                  | 77.7 °                      | Abakumov, G. A.; Cherkasov, V. K.; Piskunov, A.V.; Lado, A. V.; Fukin, G. K.; Abakumova, L. G. <i>Izv. Akad. Nauk SSSR, Ser. Khim.</i> <b>2006</b> , 1103-1111.                                     |
| 3        | OLAZAD         | 2.289 Å                  | 82.9 °                      | Mauck, C. M.; van den Heuvel, T. W. P.; Hull, M. M.; Zeller, M.; Oertel, C. M. <i>Inorg. Chem.</i> <b>2010</b> , 49, 10736-10743.                                                                   |
| 3        | NIPKAY         | 2.291 Å                  | 78.3 °                      | Parr, J.; Ross, A. T.; Slawin, A. M. Z. <i>Polyhedron</i> <b>1997</b> , 16, 2765-2770.                                                                                                              |
| 3        | MAJGOT         | 2.299 Å                  | 83.2 °                      | van Zandt, W.; Huffman, J. C.; Stewart, J. L. <i>Main Group Met. Chem.</i> <b>1998</b> , 21, 237-240.                                                                                               |
| 3        | MUKYIA         | 2.303 Å                  | 77.1 °                      | Yu-Jun Shi; Yan Xu; Xue-Tai Chen; Ziling Xue; Xiao-Zeng You <i>Eur. J. Inorg. Chem.</i> <b>2002</b> , 3210-3213.                                                                                    |
| 3        | QEXVUL         | 2.304 Å                  | 83.9 °                      | Abakumov, G. A.; Cherkasov, V. K.; Piskunov, A.V.; Lado, A. V.; Fukin, G. K.; Abakumova, L. G. <i>Izv. Akad. Nauk SSSR, Ser. Khim.</i> <b>2006</b> , 1103-1111.                                     |
| 3        | QEKZAI         | 2.308 Å                  | 78.5 °                      | Oldag, T.; Keller, H.-L. <i>Z. Anorg. Allg. Chem.</i> <b>2006</b> , 632, 1267-1272.                                                                                                                 |
| 3        | MAJGOT         | 2.325 Å                  | 84.5 °                      | van Zandt, W.; Huffman, J. C.; Stewart, J. L. <i>Main Group Met. Chem.</i> <b>1998</b> , 21, 237-240.                                                                                               |
| 3        | NIPJUR         | 2.340 Å                  | 75.1 °                      | Parr, J.; Ross, A. T.; Slawin, A. M. Z. <i>Polyhedron</i> <b>1997</b> , 16, 2765-2770.                                                                                                              |
| 3        | NIPJOL         | 2.359 Å                  | 78.4 °                      | Parr, J.; Ross, A. T.; Slawin, A. M. Z. <i>Polyhedron</i> <b>1997</b> , 16, 2765-2770.                                                                                                              |
| 3        | QEKYUB01       | 2.361 Å                  | 77.5 °                      | Oldag, T.; Keller, H.-L. <i>Z. Anorg. Allg. Chem.</i> <b>2006</b> , 632, 1267-1272.                                                                                                                 |
| 3        | BIBTIQ         | 2.464 Å                  | 81.9 °                      | Naumov, P.; Cakir, S.; Bulut, I.; Bicer, E.; Cakir, O.; Jovanovski, G.; Ibrahim, A. R.; Usman, A.; Fun, H.-K.; Chantrapromma, S.; Ng, S. W. <i>Main Group Met. Chem.</i> <b>2002</b> , 25, 175-176. |
|          | <b>Average</b> | <b>2.318 Å</b>           | <b>79.9 °/10 structures</b> |                                                                                                                                                                                                     |

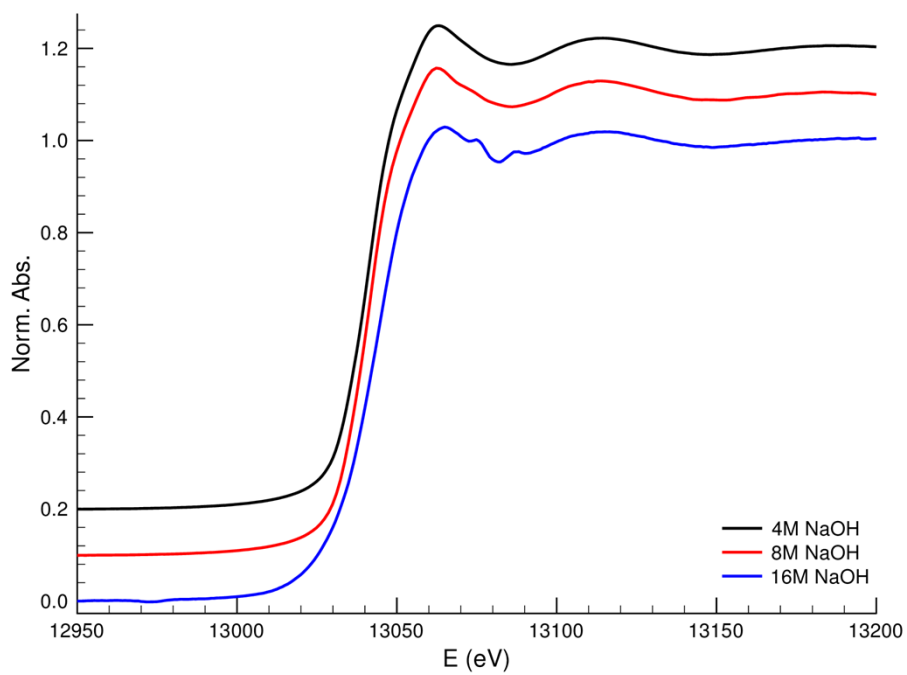

**Fig. S1.** L3 absorption edges of the trihydroxidoplumate(II) complex in 4, 8 and 16 mol·dm<sup>-3</sup> sodium hydroxide aqueous solutions; offsets are 0.2, 0.1 and no offset, respectively.
